# Supplementary material for: New Steroids from the Soft Coral Nephthea chabrolii
Source: MDPI journal article supplement (doi:10.3390/md11020571), 2013-02-22
Supplement: s2 [file s2]

marinedrugs-11-00571-s001.mol
  corina  05201405263D 1   1.00000     0.00000 
CORINA 3.49 0023  12.04.2013
 38 41  0  0  0  0  0  0  0  0999 V2000
    0.0275    1.7185   -0.0637 C   0  0  0  0  0  0  0  0  0  0  0  0
   -0.0518    0.1925   -0.1339 C   0  0  0  0  0  0  0  0  0  0  0  0
    0.5250   -0.4081    1.1515 C   0  0  0  0  0  0  0  0  0  0  0  0
    1.9343    0.1279    1.3404 C   0  0  0  0  0  0  0  0  0  0  0  0
    2.1337    1.6129    1.2752 C   0  0  0  0  0  0  0  0  0  0  0  0
    1.4922    2.1567   -0.0045 C   0  0  0  0  0  0  0  0  0  0  0  0
    2.8940   -0.7243    1.5518 C   0  0  0  0  0  0  0  0  0  0  0  0
    4.3245   -0.3131    1.7454 C   0  0  0  0  0  0  0  0  0  0  0  0
    4.3680    1.1140    2.3030 C   0  0  0  0  0  0  0  0  0  0  0  0
    3.5940    2.0277    1.3427 C   0  0  0  0  0  0  0  0  0  0  0  0
    5.8056    1.6002    2.3401 C   0  0  0  0  0  0  0  0  0  0  0  0
    5.7927    3.0305    2.9428 C   0  0  0  0  0  0  0  0  0  0  0  0
    5.1563    3.9425    1.9111 C   0  0  0  0  0  0  0  0  0  0  0  0
    3.6951    3.4947    1.7510 C   0  0  0  0  0  0  0  0  0  0  0  0
    6.7342    0.8621    3.3106 C   0  0  0  0  0  0  0  0  0  0  0  0
    7.8678    1.8943    3.5595 C   0  0  0  0  0  0  0  0  0  0  0  0
    7.2616    3.2887    3.2633 C   0  0  0  0  0  0  0  0  0  0  0  0
    8.9842    5.1851    6.1349 C   0  0  0  0  0  0  0  0  0  0  0  0
    8.8634    4.3858    4.8359 C   0  0  0  0  0  0  0  0  0  0  0  0
    7.3852    4.1922    4.4919 C   0  0  0  0  0  0  0  0  0  0  0  0
   11.1837    4.3066    7.2321 C   0  0  0  0  0  0  0  0  0  0  0  0
   10.4402    5.3758    6.4738 C   0  0  0  0  0  0  0  0  0  0  0  0
   10.5141    4.0851    8.5898 C   0  0  0  0  0  0  0  0  0  0  0  0
   11.1581    3.0027    6.4320 C   0  0  0  0  0  0  0  0  0  0  0  0
   11.0595    6.4711    6.1092 C   0  0  0  0  0  0  0  0  0  0  0  0
    3.9196    1.1443    3.2961 H   0  0  0  0  0  0  0  0  0  0  0  0
    4.9647    3.0447    4.2293 C   0  0  0  0  0  0  0  0  0  0  0  0
    6.0526    0.5561    4.5287 O   0  0  0  0  0  0  0  0  0  0  0  0
    7.7606    3.7434    2.4075 H   0  0  0  0  0  0  0  0  0  0  0  0
    6.7492    5.5510    4.1917 C   0  0  0  0  0  0  0  0  0  0  0  0
    4.0266    1.9259    0.3474 H   0  0  0  0  0  0  0  0  0  0  0  0
   -1.4163   -0.2075   -0.2761 O   0  0  0  0  0  0  0  0  0  0  0  0
    6.2259    1.6150    1.3346 H   0  0  0  0  0  0  0  0  0  0  0  0
    1.4174    2.2433    2.4712 C   0  0  0  0  0  0  0  0  0  0  0  0
    1.9757    1.7151    3.7032 O   0  0  0  0  0  0  0  0  0  0  0  0
    0.5594    2.9824    4.8309 O   0  0  0  0  0  0  0  0  0  0  0  0
    1.4535    2.1699    4.8530 C   0  0  0  0  0  0  0  0  0  0  0  0
    1.9822    1.6671    6.1716 C   0  0  0  0  0  0  0  0  0  0  0  0
  1  2  1  0      
  2  3  1  0      
  3  4  1  0      
  4  5  1  0      
  5  6  1  0      
  6  1  1  0      
  4  7  2  0      
  7  8  1  0      
  8  9  1  0      
  9 10  1  0      
 10  5  1  0      
  9 11  1  0      
 11 12  1  0      
 12 13  1  0      
 13 14  1  0      
 14 10  1  0      
 11 15  1  0      
 15 16  1  0      
 16 17  1  0      
 17 12  1  0      
 18 19  1  0      
 19 20  1  0      
 20 17  1  0      
 21 22  1  0      
 22 18  1  0      
 21 23  1  0      
 21 24  1  0      
 22 25  2  0      
  9 26  1  0      
 12 27  1  0      
 15 28  1  0      
 17 29  1  0      
 20 30  1  0      
 10 31  1  0      
  2 32  1  0      
 11 33  1  0      
  5 34  1  0      
 34 35  1  0      
 35 37  1  0      
 36 37  2  0      
 37 38  1  0      
M  STY  1   1 SUP
M  SLB  1   1   1
M  SAL   1  4  35  36  37  38
M  SBL   1  1  38
M  SMT   1 OAc
M  SBV   1 38   -8.1279    5.1234
M  END
$$$$
