# Supplementary material for: New Steroids from the Soft Coral Nephthea chabrolii
Source: MDPI journal article supplement (doi:10.3390/md11020571), 2013-02-22
Supplement: s3 [file s3]

marinedrugs-11-00571-s001.mol
  ChemDraw04241410182D

 38 41  0  0  0  0  0  0  0  0999 V2000
   -3.6922   -0.7960    0.0000 C   0  0  0  0  0  0  0  0  0  0  0  0
   -3.6922   -1.6210    0.0000 C   0  0  0  0  0  0  0  0  0  0  0  0
   -2.9777   -2.0335    0.0000 C   0  0  0  0  0  0  0  0  0  0  0  0
   -2.2632   -1.6210    0.0000 C   0  0  0  0  0  0  0  0  0  0  0  0
   -2.2632   -0.7960    0.0000 C   0  0  0  0  0  0  0  0  0  0  0  0
   -2.9777   -0.3835    0.0000 C   0  0  0  0  0  0  0  0  0  0  0  0
   -1.5488   -2.0335    0.0000 C   0  0  0  0  0  0  0  0  0  0  0  0
   -0.8343   -1.6210    0.0000 C   0  0  0  0  0  0  0  0  0  0  0  0
   -0.8343   -0.7960    0.0000 C   0  0  0  0  0  0  0  0  0  0  0  0
   -1.5488   -0.3835    0.0000 C   0  0  0  0  0  0  0  0  0  0  0  0
   -0.1198   -0.3835    0.0000 C   0  0  0  0  0  0  0  0  0  0  0  0
   -0.1198    0.4415    0.0000 C   0  0  0  0  0  0  0  0  0  0  0  0
   -0.8343    0.8540    0.0000 C   0  0  0  0  0  0  0  0  0  0  0  0
   -1.5488    0.4415    0.0000 C   0  0  0  0  0  0  0  0  0  0  0  0
    0.6648   -0.6384    0.0000 C   0  0  0  0  0  0  0  0  0  0  0  0
    1.1497    0.0290    0.0000 C   0  0  0  0  0  0  0  0  0  0  0  0
    0.6648    0.6965    0.0000 C   0  0  0  0  0  0  0  0  0  0  0  0
    2.3057    0.8689    0.0000 C   0  0  0  0  0  0  0  0  0  0  0  0
    1.8208    1.5364    0.0000 C   0  0  0  0  0  0  0  0  0  0  0  0
    1.0003    1.4501    0.0000 C   0  0  0  0  0  0  0  0  0  0  0  0
    3.6111    0.2877    0.0000 C   0  0  0  0  0  0  0  0  0  0  0  0
    3.1262    0.9552    0.0000 C   0  0  0  0  0  0  0  0  0  0  0  0
    3.6111   -0.5373    0.0000 C   0  0  0  0  0  0  0  0  0  0  0  0
    4.4080    0.5012    0.0000 C   0  0  0  0  0  0  0  0  0  0  0  0
    3.3398    1.7520    0.0000 C   0  0  0  0  0  0  0  0  0  0  0  0
   -0.8343    0.0290    0.0000 H   0  0  0  0  0  0  0  0  0  0  0  0
   -0.1198    1.2665    0.0000 C   0  0  0  0  0  0  0  0  0  0  0  0
    1.0773   -1.3529    0.0000 O   0  0  0  0  0  0  0  0  0  0  0  0
    1.4617    0.9100    0.0000 H   0  0  0  0  0  0  0  0  0  0  0  0
    0.4170    2.0335    0.0000 C   0  0  0  0  0  0  0  0  0  0  0  0
   -1.5488   -1.2085    0.0000 H   0  0  0  0  0  0  0  0  0  0  0  0
   -4.4067   -2.0335    0.0000 O   0  0  0  0  0  0  0  0  0  0  0  0
   -0.1198   -1.2085    0.0000 H   0  0  0  0  0  0  0  0  0  0  0  0
   -2.2632    0.0290    0.0000 C   0  0  0  0  0  0  0  0  0  0  0  0
   -2.9791    0.0290    0.0000 O   0  0  0  0  0  0  0  0  0  0  0  0
   -3.6936    1.2665    0.0000 O   0  0  0  0  0  0  0  0  0  0  0  0
   -3.6936    0.4415    0.0000 C   0  0  0  0  0  0  0  0  0  0  0  0
   -4.4080    0.0290    0.0000 C   0  0  0  0  0  0  0  0  0  0  0  0
  1  2  1  0      
  2  3  1  0      
  3  4  1  0      
  4  5  1  0      
  5  6  1  0      
  6  1  1  0      
  4  7  2  0      
  7  8  1  0      
  8  9  1  0      
  9 10  1  0      
 10  5  1  0      
  9 11  1  0      
 11 12  1  0      
 12 13  1  0      
 13 14  1  0      
 14 10  1  0      
 11 15  1  0      
 15 16  1  0      
 16 17  1  0      
 17 12  1  0      
 18 19  1  0      
 19 20  1  0      
 20 17  1  0      
 21 22  1  0      
 22 18  1  0      
 21 23  1  0      
 21 24  1  0      
 22 25  2  0      
  9 26  1  1      
 12 27  1  1      
 15 28  1  1      
 17 29  1  6      
 20 30  1  6      
 10 31  1  6      
  2 32  1  1      
 11 33  1  6      
  5 34  1  1      
 34 35  1  0      
 35 37  1  0      
 36 37  2  0      
 37 38  1  0      
M  STY  1   1 SUP
M  SLB  1   1   1
M  SAL   1  4  35  36  37  38
M  SBL   1  1  38
M  SMT   1 OAc
M  SBV   1 38   -8.1279    5.1234
M  END
