# Supplementary material for: New Steroids from the Soft Coral Nephthea chabrolii
Source: MDPI journal article supplement (doi:10.3390/md11020571), 2013-02-22
Supplement: s4 [file s4]

marinedrugs-11-00571-s002.mol
  corina  05201405263D 1   1.00000     0.00000 
CORINA 3.49 0023  12.04.2013
 33 36  0  0  0  0  0  0  0  0999 V2000
   -0.0187    1.5311    0.0105 C   0  0  0  0  0  0  0  0  0  0  0  0
    0.0021   -0.0041    0.0020 C   0  0  0  0  0  0  0  0  0  0  0  0
    0.5591   -0.4616    1.3441 C   0  0  0  0  0  0  0  0  0  0  0  0
    1.8667    0.2322    1.6688 C   0  0  0  0  0  0  0  0  0  0  0  0
    2.2493    1.3217    1.0694 C   0  0  0  0  0  0  0  0  0  0  0  0
    1.4281    2.0084   -0.0008 C   0  0  0  0  0  0  0  0  0  0  0  0
    2.6729   -0.4405    2.7601 C   0  0  0  0  0  0  0  0  0  0  0  0
    4.1116    0.0602    2.8104 C   0  0  0  0  0  0  0  0  0  0  0  0
    4.0659    1.5896    2.7732 C   0  0  0  0  0  0  0  0  0  0  0  0
    3.5693    1.9849    1.3797 C   0  0  0  0  0  0  0  0  0  0  0  0
    5.4441    2.1961    2.9414 C   0  0  0  0  0  0  0  0  0  0  0  0
    5.2479    3.7381    2.9304 C   0  0  0  0  0  0  0  0  0  0  0  0
    4.8454    4.1505    1.5302 C   0  0  0  0  0  0  0  0  0  0  0  0
    3.4846    3.4963    1.2227 C   0  0  0  0  0  0  0  0  0  0  0  0
    6.1114    1.9817    4.3043 C   0  0  0  0  0  0  0  0  0  0  0  0
    7.1229    3.1576    4.3857 C   0  0  0  0  0  0  0  0  0  0  0  0
    6.5812    4.2654    3.4478 C   0  0  0  0  0  0  0  0  0  0  0  0
    7.4809    7.2704    5.6771 C   0  0  0  0  0  0  0  0  0  0  0  0
    7.7095    6.0418    4.7944 C   0  0  0  0  0  0  0  0  0  0  0  0
    6.3708    5.5646    4.2279 C   0  0  0  0  0  0  0  0  0  0  0  0
    9.3501    7.1187    7.4926 C   0  0  0  0  0  0  0  0  0  0  0  0
    8.7995    7.7405    6.2351 C   0  0  0  0  0  0  0  0  0  0  0  0
    8.3641    7.3348    8.6424 C   0  0  0  0  0  0  0  0  0  0  0  0
    9.5557    5.6187    7.2722 C   0  0  0  0  0  0  0  0  0  0  0  0
    9.4671    8.6895    5.6271 C   0  0  0  0  0  0  0  0  0  0  0  0
    3.3827    1.9634    3.5358 H   0  0  0  0  0  0  0  0  0  0  0  0
    4.1421    4.1210    3.9160 C   0  0  0  0  0  0  0  0  0  0  0  0
    7.2700    4.4289    2.6190 H   0  0  0  0  0  0  0  0  0  0  0  0
    5.8021    6.6343    3.2934 C   0  0  0  0  0  0  0  0  0  0  0  0
    4.2994    1.6284    0.6531 H   0  0  0  0  0  0  0  0  0  0  0  0
   -1.3246   -0.5065   -0.1695 O   0  0  0  0  0  0  0  0  0  0  0  0
    6.0991    1.8864    2.1271 H   0  0  0  0  0  0  0  0  0  0  0  0
    2.0496   -0.1853    4.0204 O   0  0  0  0  0  0  0  0  0  0  0  0
  1  2  1  0      
  2  3  1  0      
  3  4  1  0      
  4  5  2  0      
  5  6  1  0      
  6  1  1  0      
  4  7  1  0      
  7  8  1  0      
  8  9  1  0      
  9 10  1  0      
 10  5  1  0      
  9 11  1  0      
 11 12  1  0      
 12 13  1  0      
 13 14  1  0      
 14 10  1  0      
 11 15  1  0      
 15 16  1  0      
 16 17  1  0      
 17 12  1  0      
 18 19  1  0      
 19 20  1  0      
 20 17  1  0      
 21 22  1  0      
 22 18  1  0      
 21 23  1  0      
 21 24  1  0      
 22 25  2  0      
  9 26  1  0      
 12 27  1  0      
 17 28  1  0      
 20 29  1  0      
 10 30  1  0      
  2 31  1  0      
 11 32  1  0      
  7 33  1  0      
M  END
$$$$
