# Supplementary material for: New Steroids from the Soft Coral Nephthea chabrolii
Source: MDPI journal article supplement (doi:10.3390/md11020571), 2013-02-22
Supplement: s5 [file s5]

marinedrugs-11-00571-s002.mol
  ChemDraw04241410182D

 33 36  0  0  0  0  0  0  0  0999 V2000
   -3.6929   -0.3835    0.0000 C   0  0  0  0  0  0  0  0  0  0  0  0
   -3.6929   -1.2085    0.0000 C   0  0  0  0  0  0  0  0  0  0  0  0
   -2.9784   -1.6210    0.0000 C   0  0  0  0  0  0  0  0  0  0  0  0
   -2.2639   -1.2085    0.0000 C   0  0  0  0  0  0  0  0  0  0  0  0
   -2.2639   -0.3835    0.0000 C   0  0  0  0  0  0  0  0  0  0  0  0
   -2.9784    0.0290    0.0000 C   0  0  0  0  0  0  0  0  0  0  0  0
   -1.5495   -1.6210    0.0000 C   0  0  0  0  0  0  0  0  0  0  0  0
   -0.8350   -1.2085    0.0000 C   0  0  0  0  0  0  0  0  0  0  0  0
   -0.8350   -0.3835    0.0000 C   0  0  0  0  0  0  0  0  0  0  0  0
   -1.5495    0.0290    0.0000 C   0  0  0  0  0  0  0  0  0  0  0  0
   -0.1205    0.0290    0.0000 C   0  0  0  0  0  0  0  0  0  0  0  0
   -0.1205    0.8540    0.0000 C   0  0  0  0  0  0  0  0  0  0  0  0
   -0.8350    1.2665    0.0000 C   0  0  0  0  0  0  0  0  0  0  0  0
   -1.5495    0.8540    0.0000 C   0  0  0  0  0  0  0  0  0  0  0  0
    0.6641   -0.2259    0.0000 C   0  0  0  0  0  0  0  0  0  0  0  0
    1.1490    0.4415    0.0000 C   0  0  0  0  0  0  0  0  0  0  0  0
    0.6641    1.1090    0.0000 C   0  0  0  0  0  0  0  0  0  0  0  0
    2.3051    1.2814    0.0000 C   0  0  0  0  0  0  0  0  0  0  0  0
    1.8201    1.9489    0.0000 C   0  0  0  0  0  0  0  0  0  0  0  0
    0.9997    1.8626    0.0000 C   0  0  0  0  0  0  0  0  0  0  0  0
    3.6105    0.7002    0.0000 C   0  0  0  0  0  0  0  0  0  0  0  0
    3.1255    1.3677    0.0000 C   0  0  0  0  0  0  0  0  0  0  0  0
    3.6105   -0.1248    0.0000 C   0  0  0  0  0  0  0  0  0  0  0  0
    4.4074    0.9137    0.0000 C   0  0  0  0  0  0  0  0  0  0  0  0
    3.3391    2.1645    0.0000 C   0  0  0  0  0  0  0  0  0  0  0  0
   -0.8350    0.4415    0.0000 H   0  0  0  0  0  0  0  0  0  0  0  0
   -0.1205    1.6790    0.0000 C   0  0  0  0  0  0  0  0  0  0  0  0
    1.4610    1.3225    0.0000 H   0  0  0  0  0  0  0  0  0  0  0  0
    0.4163    2.4460    0.0000 C   0  0  0  0  0  0  0  0  0  0  0  0
   -1.5495   -0.7960    0.0000 H   0  0  0  0  0  0  0  0  0  0  0  0
   -4.4074   -1.6210    0.0000 O   0  0  0  0  0  0  0  0  0  0  0  0
   -0.1205   -0.7960    0.0000 H   0  0  0  0  0  0  0  0  0  0  0  0
   -1.5495   -2.4460    0.0000 O   0  0  0  0  0  0  0  0  0  0  0  0
  1  2  1  0      
  2  3  1  0      
  3  4  1  0      
  4  5  2  0      
  5  6  1  0      
  6  1  1  0      
  4  7  1  0      
  7  8  1  0      
  8  9  1  0      
  9 10  1  0      
 10  5  1  0      
  9 11  1  0      
 11 12  1  0      
 12 13  1  0      
 13 14  1  0      
 14 10  1  0      
 11 15  1  0      
 15 16  1  0      
 16 17  1  0      
 17 12  1  0      
 18 19  1  0      
 19 20  1  0      
 20 17  1  0      
 21 22  1  0      
 22 18  1  0      
 21 23  1  0      
 21 24  1  0      
 22 25  2  0      
  9 26  1  1      
 12 27  1  1      
 17 28  1  6      
 20 29  1  6      
 10 30  1  6      
  2 31  1  1      
 11 32  1  6      
  7 33  1  1      
M  END
