# Supplementary material for: New Steroids from the Soft Coral Nephthea chabrolii
Source: MDPI journal article supplement (doi:10.3390/md11020571), 2013-02-22
Supplement: s7 [file s7]

marinedrugs-11-00571-s003.mol
  ChemDraw04241410192D

 34 37  0  0  0  0  0  0  0  0999 V2000
   -3.6929   -0.4866    0.0000 C   0  0  0  0  0  0  0  0  0  0  0  0
   -3.6929   -1.3116    0.0000 C   0  0  0  0  0  0  0  0  0  0  0  0
   -2.9784   -1.7241    0.0000 C   0  0  0  0  0  0  0  0  0  0  0  0
   -2.2639   -1.3116    0.0000 C   0  0  0  0  0  0  0  0  0  0  0  0
   -2.2639   -0.4866    0.0000 C   0  0  0  0  0  0  0  0  0  0  0  0
   -2.9784   -0.0741    0.0000 C   0  0  0  0  0  0  0  0  0  0  0  0
   -1.5495   -1.7241    0.0000 C   0  0  0  0  0  0  0  0  0  0  0  0
   -0.8350   -1.3116    0.0000 C   0  0  0  0  0  0  0  0  0  0  0  0
   -0.8350   -0.4866    0.0000 C   0  0  0  0  0  0  0  0  0  0  0  0
   -1.5495   -0.0741    0.0000 C   0  0  0  0  0  0  0  0  0  0  0  0
   -0.1205   -0.0741    0.0000 C   0  0  0  0  0  0  0  0  0  0  0  0
   -0.1205    0.7509    0.0000 C   0  0  0  0  0  0  0  0  0  0  0  0
   -0.8350    1.1634    0.0000 C   0  0  0  0  0  0  0  0  0  0  0  0
   -1.5495    0.7509    0.0000 C   0  0  0  0  0  0  0  0  0  0  0  0
    0.6641   -0.3291    0.0000 C   0  0  0  0  0  0  0  0  0  0  0  0
    1.1490    0.3384    0.0000 C   0  0  0  0  0  0  0  0  0  0  0  0
    0.6641    1.0058    0.0000 C   0  0  0  0  0  0  0  0  0  0  0  0
    2.3051    1.1783    0.0000 C   0  0  0  0  0  0  0  0  0  0  0  0
    1.8201    1.8457    0.0000 C   0  0  0  0  0  0  0  0  0  0  0  0
    0.9997    1.7595    0.0000 C   0  0  0  0  0  0  0  0  0  0  0  0
    3.6105    0.5971    0.0000 C   0  0  0  0  0  0  0  0  0  0  0  0
    3.1255    1.2645    0.0000 C   0  0  0  0  0  0  0  0  0  0  0  0
    3.6105   -0.2279    0.0000 C   0  0  0  0  0  0  0  0  0  0  0  0
    4.4074    0.8106    0.0000 C   0  0  0  0  0  0  0  0  0  0  0  0
    3.3391    2.0614    0.0000 C   0  0  0  0  0  0  0  0  0  0  0  0
   -0.8350    0.3384    0.0000 H   0  0  0  0  0  0  0  0  0  0  0  0
   -0.1205    1.5759    0.0000 C   0  0  0  0  0  0  0  0  0  0  0  0
    1.4610    1.2194    0.0000 H   0  0  0  0  0  0  0  0  0  0  0  0
    0.4163    2.3429    0.0000 C   0  0  0  0  0  0  0  0  0  0  0  0
   -1.5495   -0.8991    0.0000 H   0  0  0  0  0  0  0  0  0  0  0  0
   -4.4074   -1.7241    0.0000 O   0  0  0  0  0  0  0  0  0  0  0  0
   -0.1205   -0.8991    0.0000 H   0  0  0  0  0  0  0  0  0  0  0  0
   -1.1925   -1.9304    0.0000 O   0  0  0  0  0  0  0  0  0  0  0  0
   -0.4781   -2.3429    0.0000 C   0  0  0  0  0  0  0  0  0  0  0  0
  1  2  1  0      
  2  3  1  0      
  3  4  1  0      
  4  5  2  0      
  5  6  1  0      
  6  1  1  0      
  4  7  1  0      
  7  8  1  0      
  8  9  1  0      
  9 10  1  0      
 10  5  1  0      
  9 11  1  0      
 11 12  1  0      
 12 13  1  0      
 13 14  1  0      
 14 10  1  0      
 11 15  1  0      
 15 16  1  0      
 16 17  1  0      
 17 12  1  0      
 18 19  1  0      
 19 20  1  0      
 20 17  1  0      
 21 22  1  0      
 22 18  1  0      
 21 23  1  0      
 21 24  1  0      
 22 25  2  0      
  9 26  1  1      
 12 27  1  1      
 17 28  1  6      
 20 29  1  6      
 10 30  1  6      
  2 31  1  1      
 11 32  1  6      
  7 33  1  1      
 33 34  1  0      
M  STY  1   1 SUP
M  SLB  1   1   1
M  SAL   1  2  33  34
M  SBL   1  1  36
M  SMT   1 OMe
M  SBV   1 36   -7.1590    4.6490
M  END
